# Supplementary material for: Community analysis of gut microbiota in hornets, the largest eusocial wasps, Vespa mandarinia and V. simillima
Source: PubMed Central journal article supplement (PMC6614390; doi:10.1038/s41598-019-46388-1), 2019-07-08
Supplement: 41598_2019_46388_MOESM1_ESM.pdf [file 41598_2019_46388_MOESM1_ESM.pdf]

Supplementary information to  
**Community analysis of gut microbiota in hornets, the largest eusocial wasps, *Vespa mandarinia* and *V. simillima***

Shota Suenami, Masaru Konishi Nobu, and Ryo Miyazaki

\* Corresponding author  
Email: ryo.miyazaki@aist.go.jp

**Supplementary Figure S1-S12**  
**Supplementary Table S1**

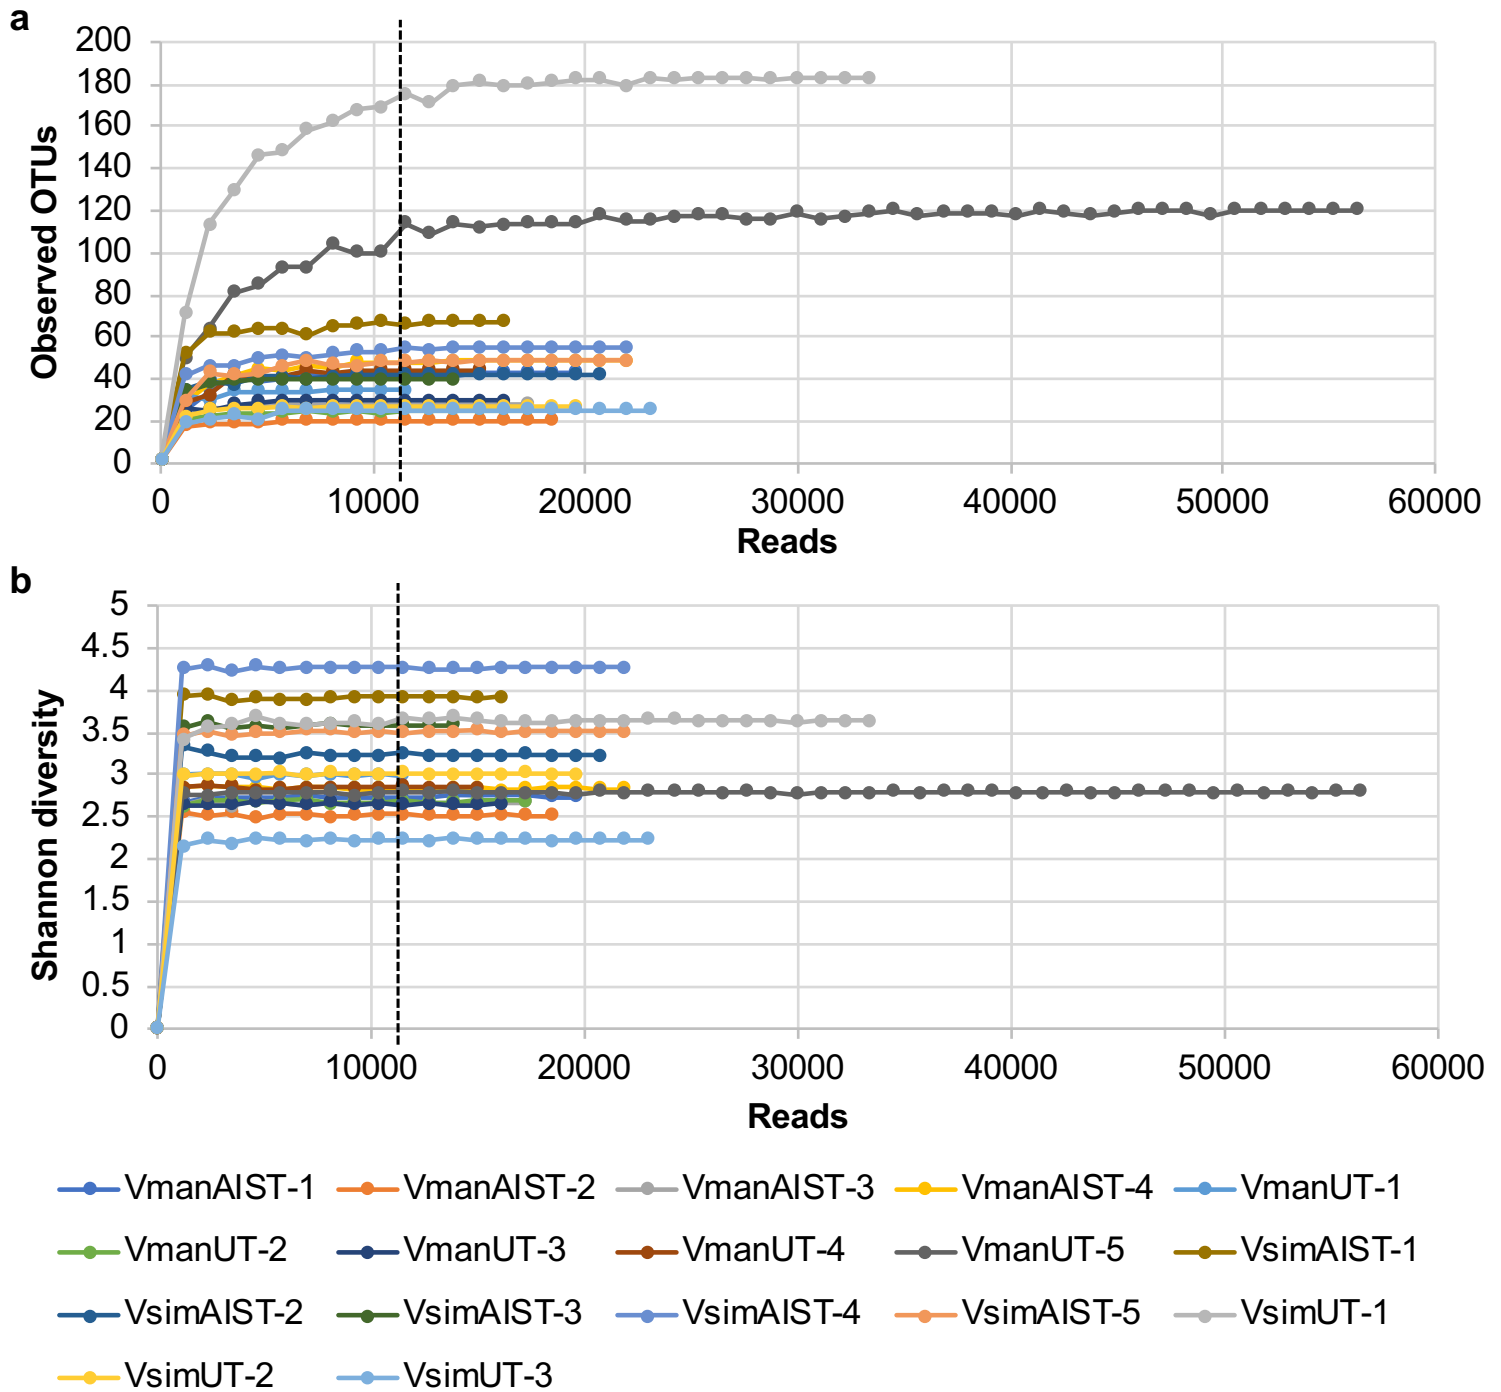

**Fig S1. Alpha rarefaction curves of hornet gut microbiomes.** The numbers of observed OTUs (a) and Shannon diversity (b) were plotted against read counts. Rarefaction curves were plotted at 50 sampling depths without iteration. Dashed lines indicate 11502 reads, which is the highest read count including all samples in this plot. Note that most samples reached plateau at this depth. In other analyses, we used 12627 reads for each sample. Sample IDs of *V. mandarinia* and *V. simillima* were shortened to Vman and Vsim, respectively. For instance, VmanAIST-1 represents *V. mandarinia* AIST-1.

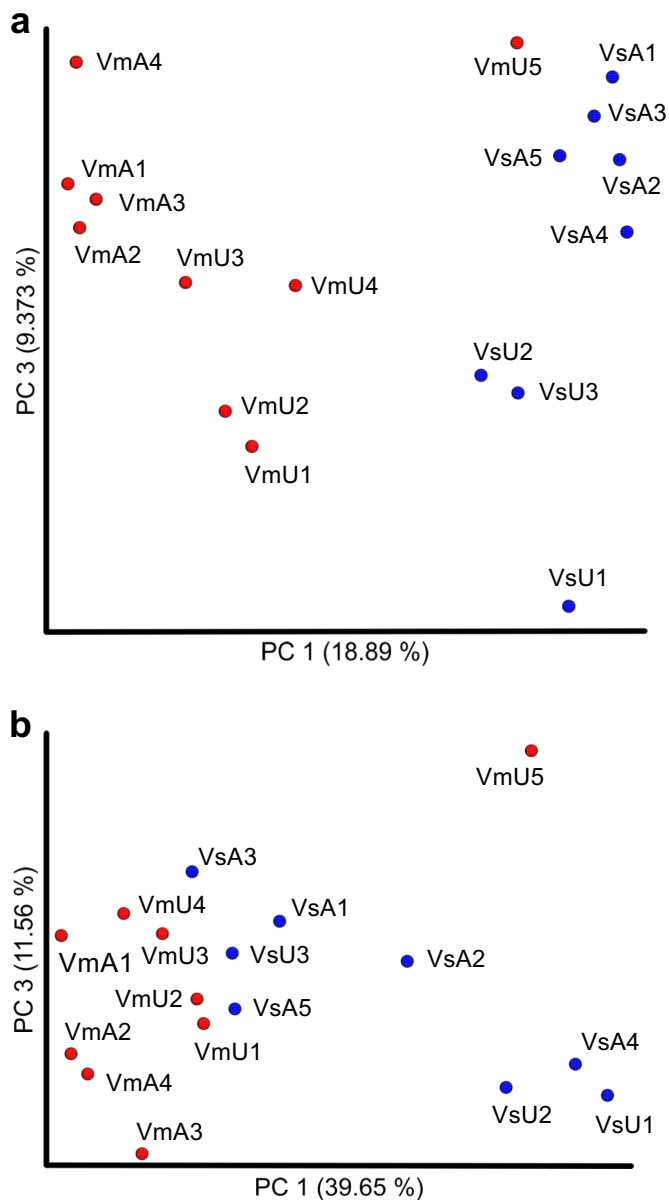

**Fig S2. PCoA plots of hornet gut microbiomes based on Jaccard distance and Bray-Curtis distance observed from the axes 2.** (a) Jaccard distance and (b) Bray-Curtis distance. PCoA plots of Fig 4 were rotated longitudinally around the axes 1. Clustering of host species was maintained for both distances. See Fig 4 for plots.

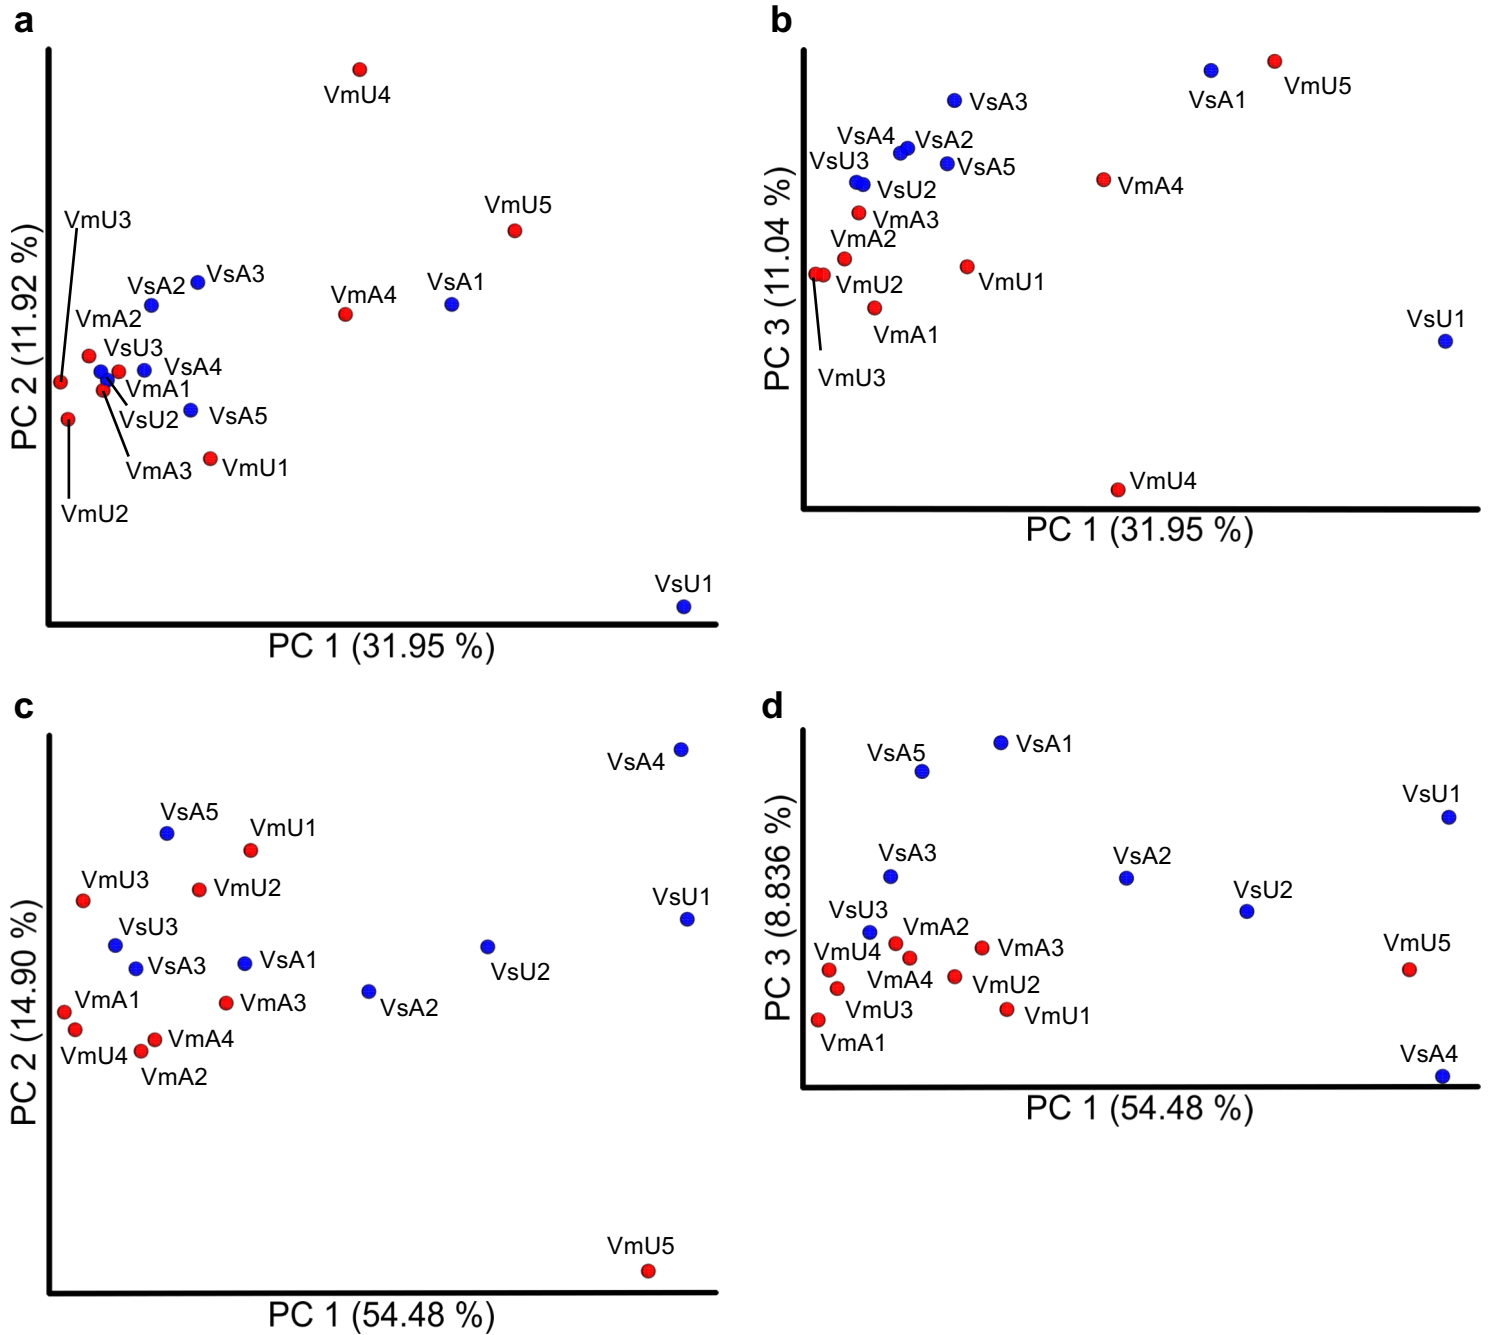

**Fig S3. PCoA plot of hornet gut microbiomes based on unweighted or weighted UniFrac.** (a and b) Unweighted UniFrac and (c and d) weighted UniFrac. Plots were viewed from the axis 3 (a and c) or axis 2 (b and d). Each point represents individual. Note that points with different colors (i.e. different host species) are not clearly separated ( $P > 0.05$ , ANOSIM and PERMANOVA in 5000 permutations for each test) while ANOSIM detected significant difference in weighted UniFrac ( $P = 0.02$  in 5000 permutations). See Fig 4 for plots.

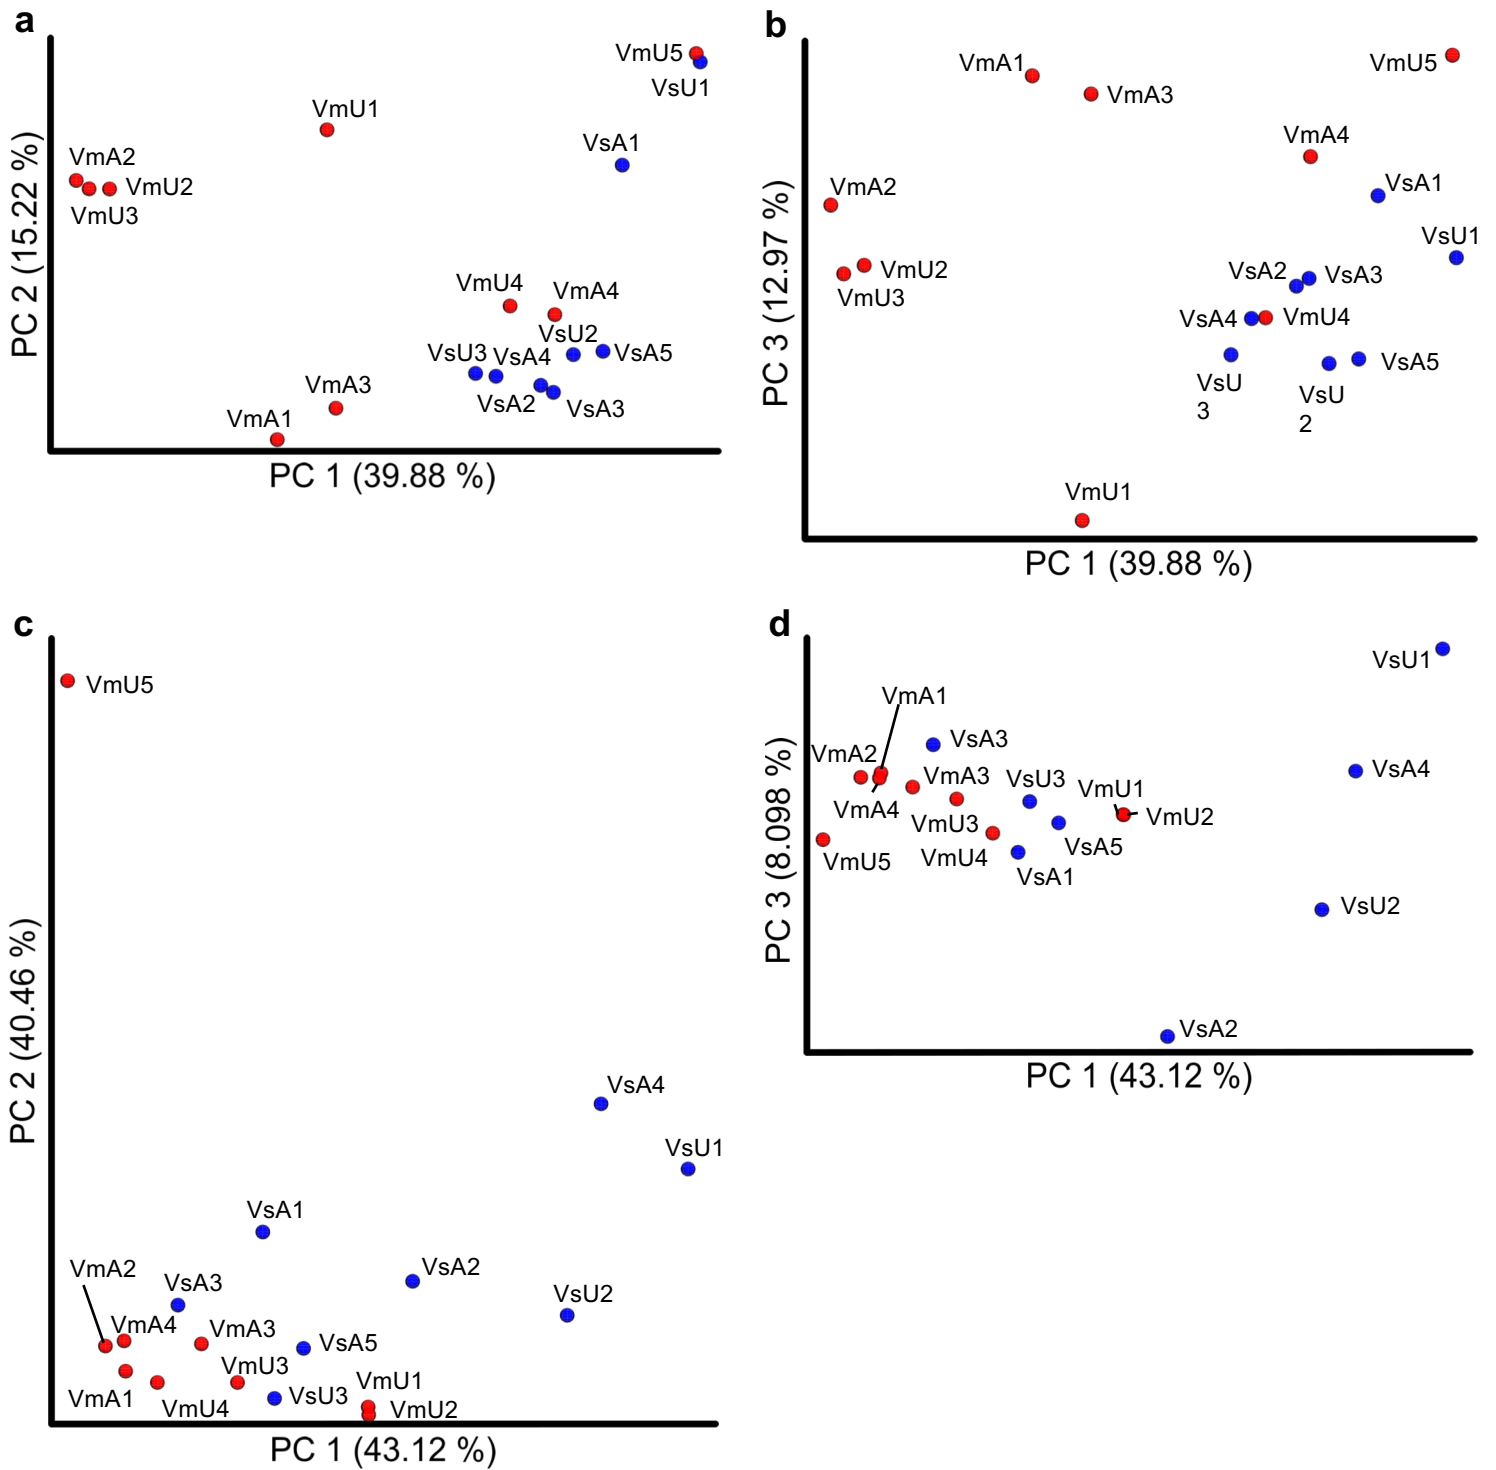

**Fig S4. PCoA plot of hornet gut microbiomes restricted to Gammaproteobacteria on unweighted or weighted UniFrac.** (a and b) unweighted UniFrac and (c and d) weighted UniFrac. Plot was viewed from the axis 3 (a and b) or axis 2 (b and f). Each point represents individual. Note that points representing *V. simillima* clustered and this cluster weakly separated from points of *V. mandarinia* ( $P = 0.008$  and  $0.007$  for unweighted UniFrac;  $P = 0.02$  for weighted UniFrac, ANOSIM and PERMANOVA respectively, in 5000 permutations for each test). See Fig 4 for plots.

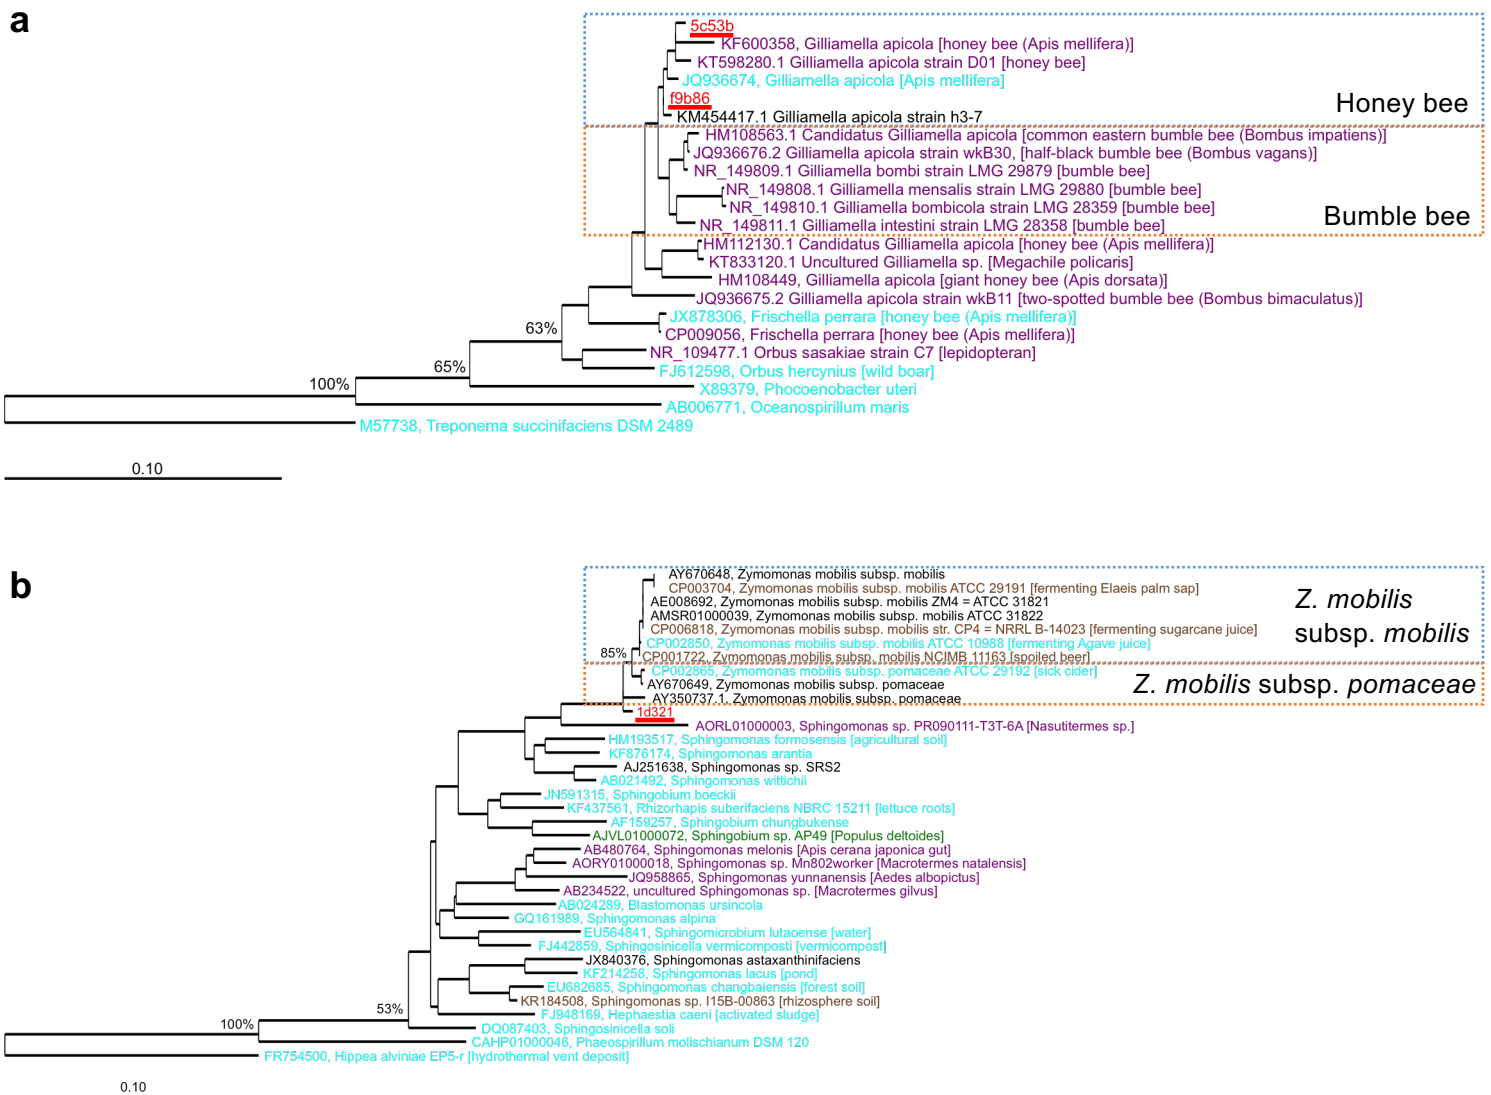

**Fig S5. Phylogenetic trees of 5c53b, f9b86, and 1d321.** Maximum-parsimony trees containing (a) 5c53b and f9b86 and (b) 1d321. Accession numbers and names of relatives are shown. Isolation sources, referred to SILVA or NCBI Nucleotide databases, are shown in brackets. Values at nodes are bootstrap values in 1000 times when small trees were constructed. Bootstrap values < 50 % are omitted. Scale bar indicates substitutions per position. *Gilliamella* clades detected in the honey bees and bumble bees are squared in blue and orange, respectively. Subspecies of *Zymomonas* were squared (*Z. mobilis* subsp. *mobilis* in blue and subsp. *pomaceae* in orange). M57738 and FR754500 were included as outgroups in (a) and (b), respectively. OTUs detected in our analysis are represented in red and underlined. Names in cyan are isolated strains, which were used in construction of small trees. Other sequences are shown in colors representing isolated sources as followings; green, plant; purple, invertebrate; brown, other; black, not described.

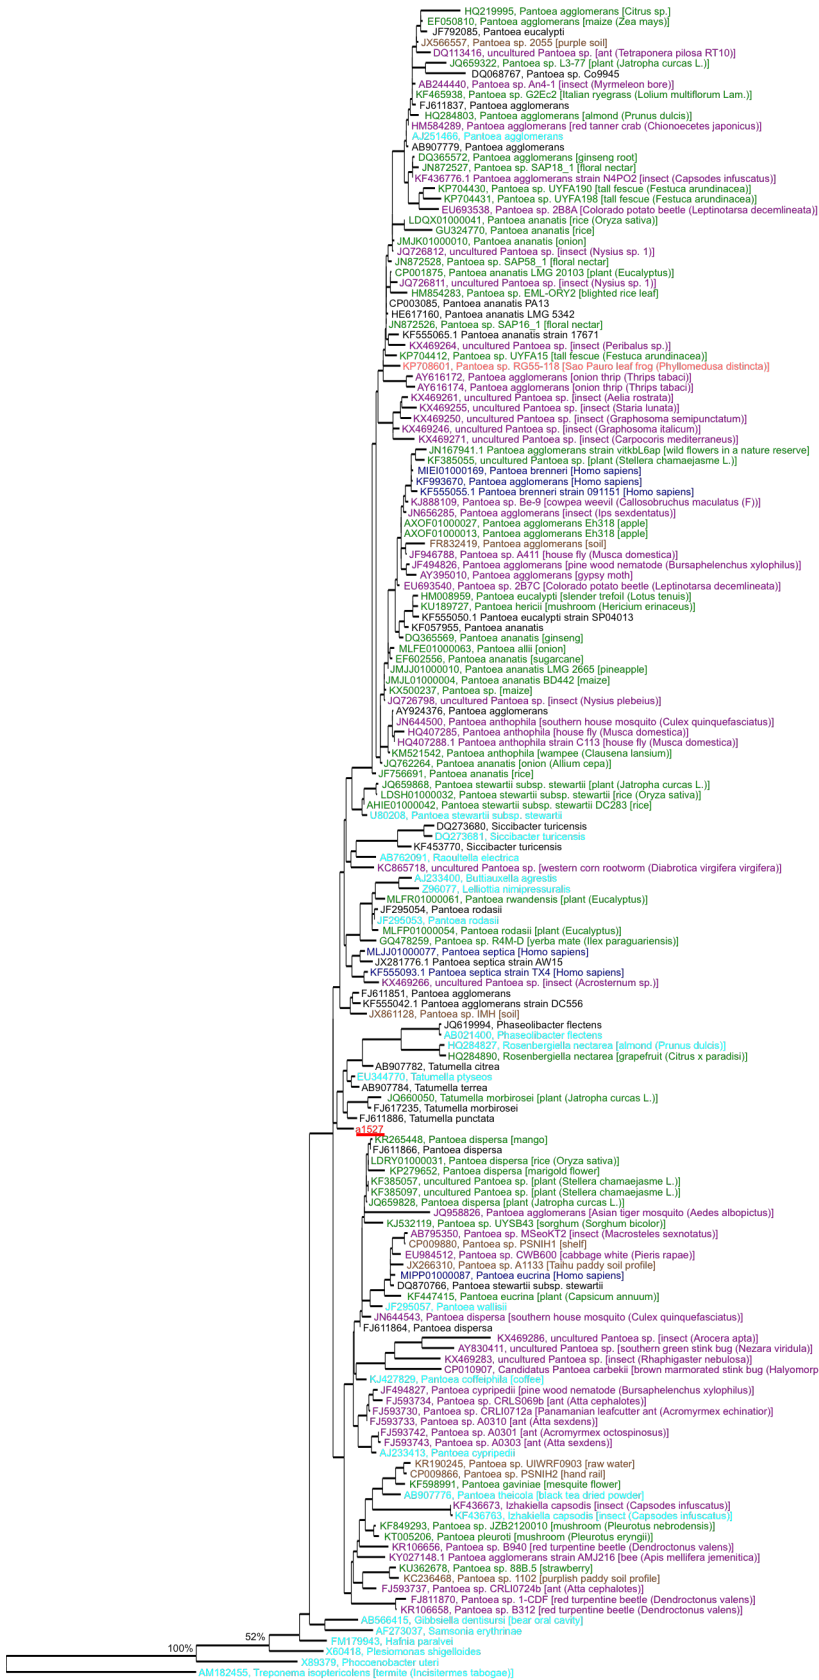

**Fig S6. Phylogenetic tree containing a1527 and relative Enterobacteriaceae.** AM182455 was used as outgroup. The OTU detected in our analysis is represented in red and underlined. Names in cyan are isolated strains, which were used in construction of small trees. Other sequences are shown in colors representing isolated sources as followings; green, plant; vermilion, vertebrate; purple, invertebrate; brown, human; other; black, not described. See Fig S5 for other information.





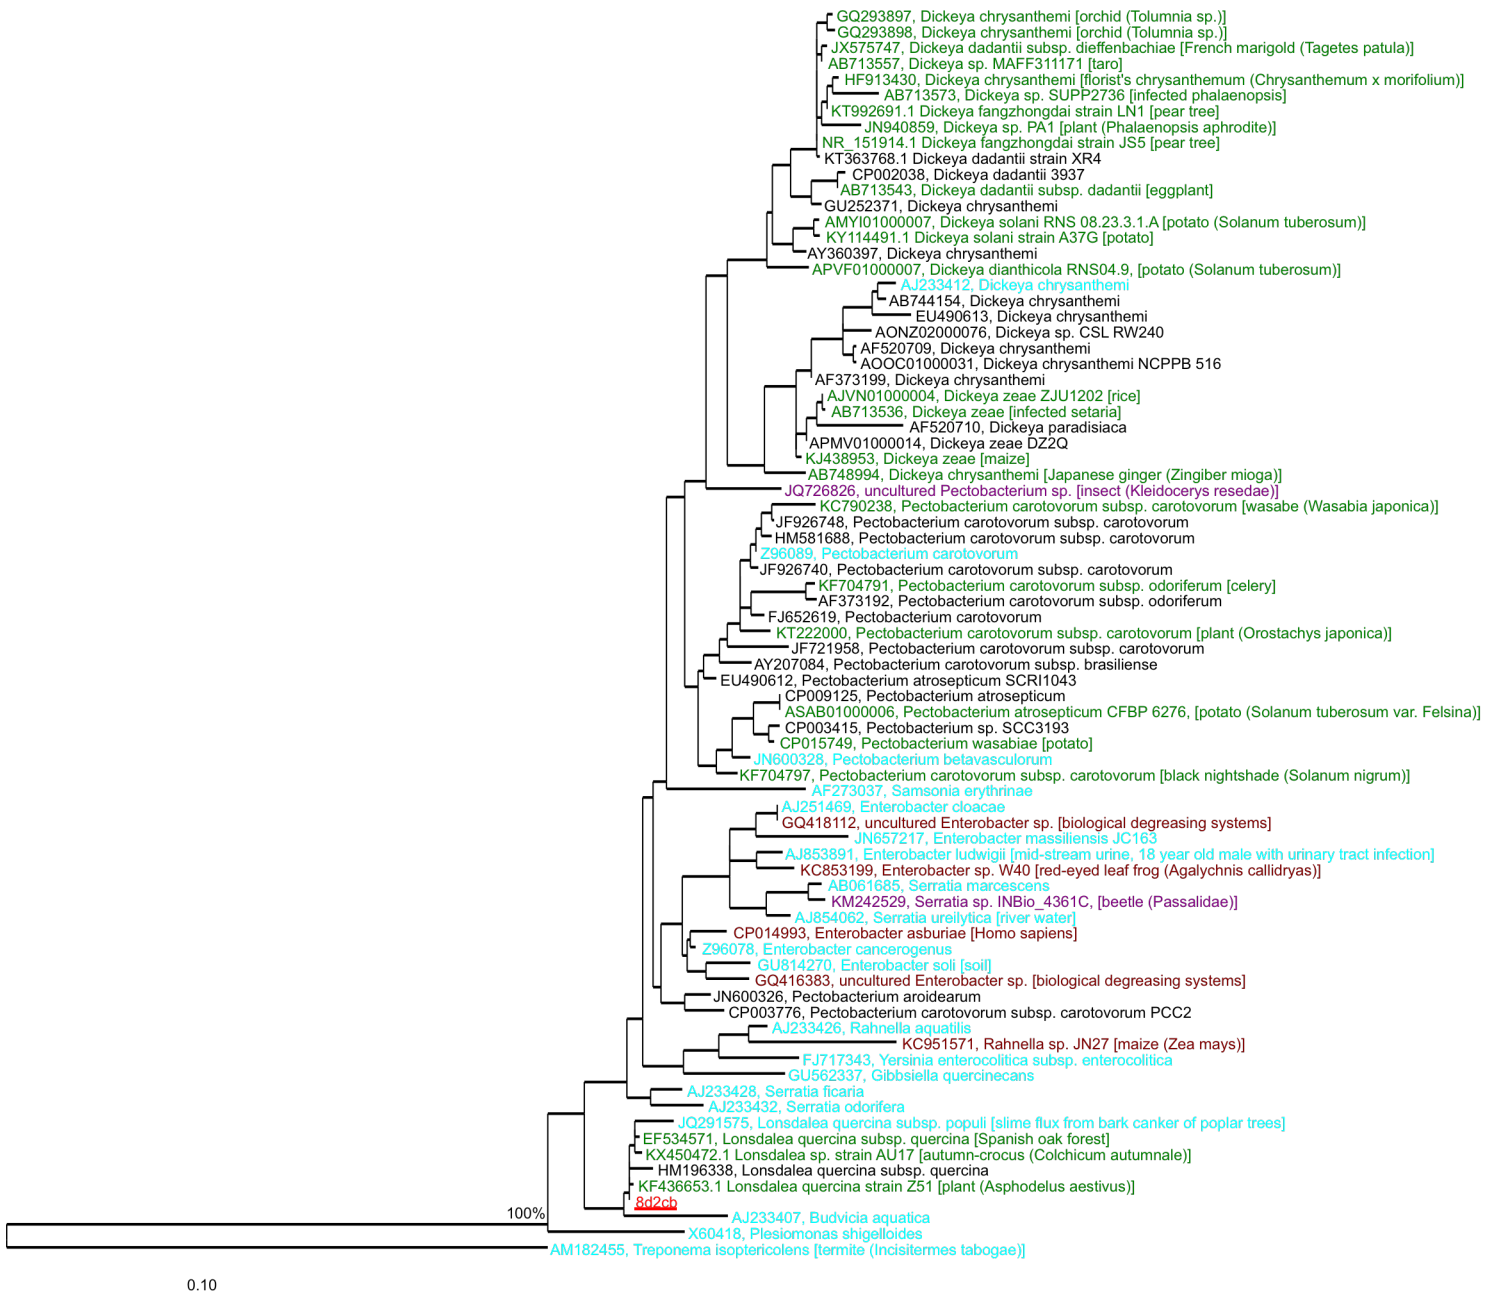

**Fig S8. Phylogenetic tree containing 8d2cb and relative Enterobacteriaceae.** Names in cyan are isolated strains, which were used in construction of small tree. CP014993, GQ416383, GQ418112, KC853199, and KC951571 are not isolated strains but also used in small tree construction (shown in Maroon). See Fig S6 for other information.

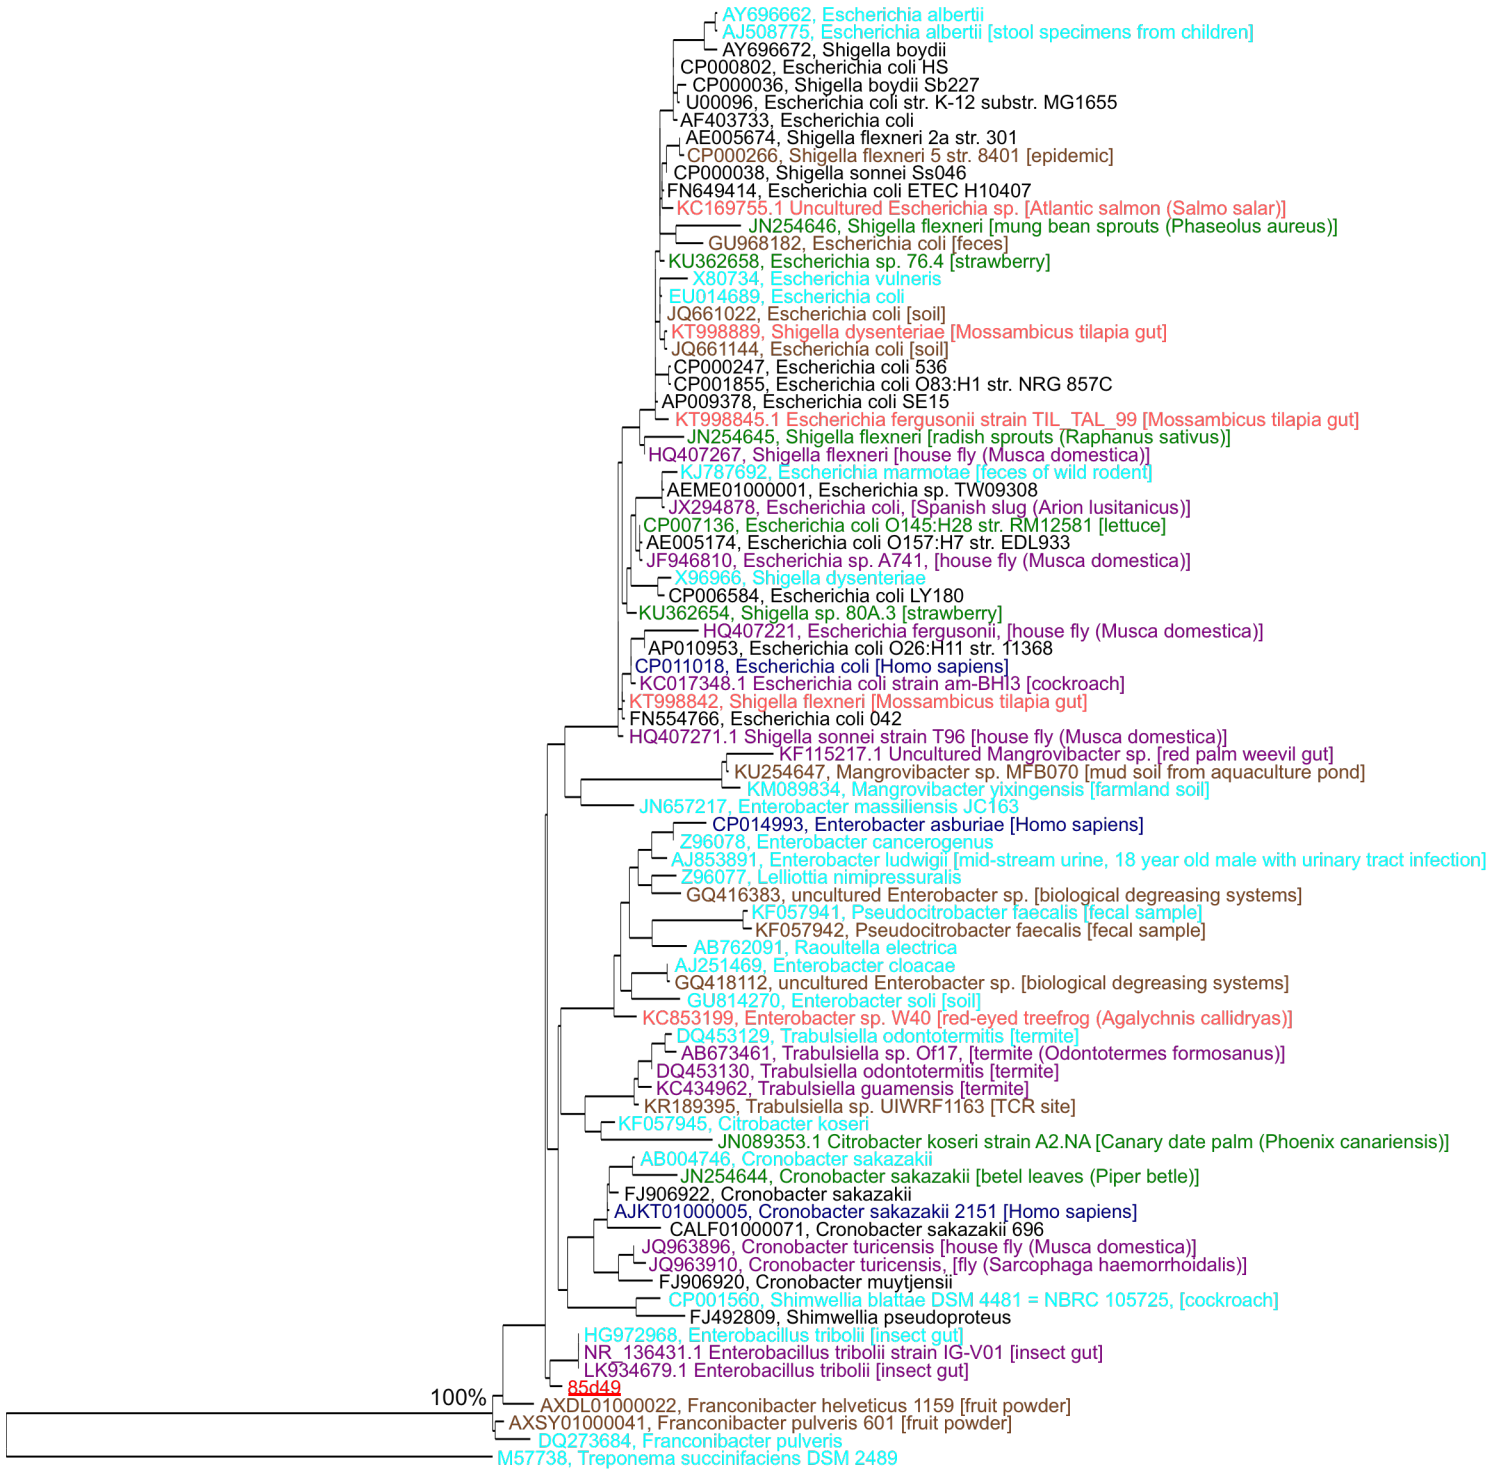

0.10

**Fig S9. Phylogenetic tree containing 85d49 and relative Enterobacteriaceae. M57738 was used as an outgroup. See Fig S6 for other information.**

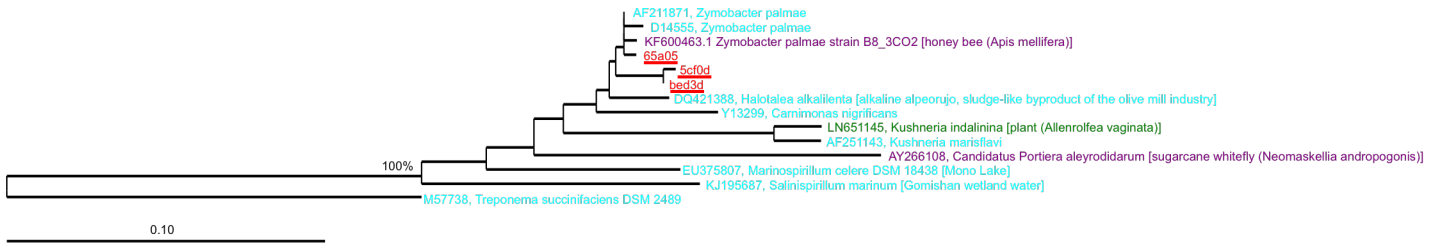

**Fig S10. Phylogenetic tree containing 65a05, 5cf0d, bed3d and relative Halomonadaceae. See Fig S9 for other information.**

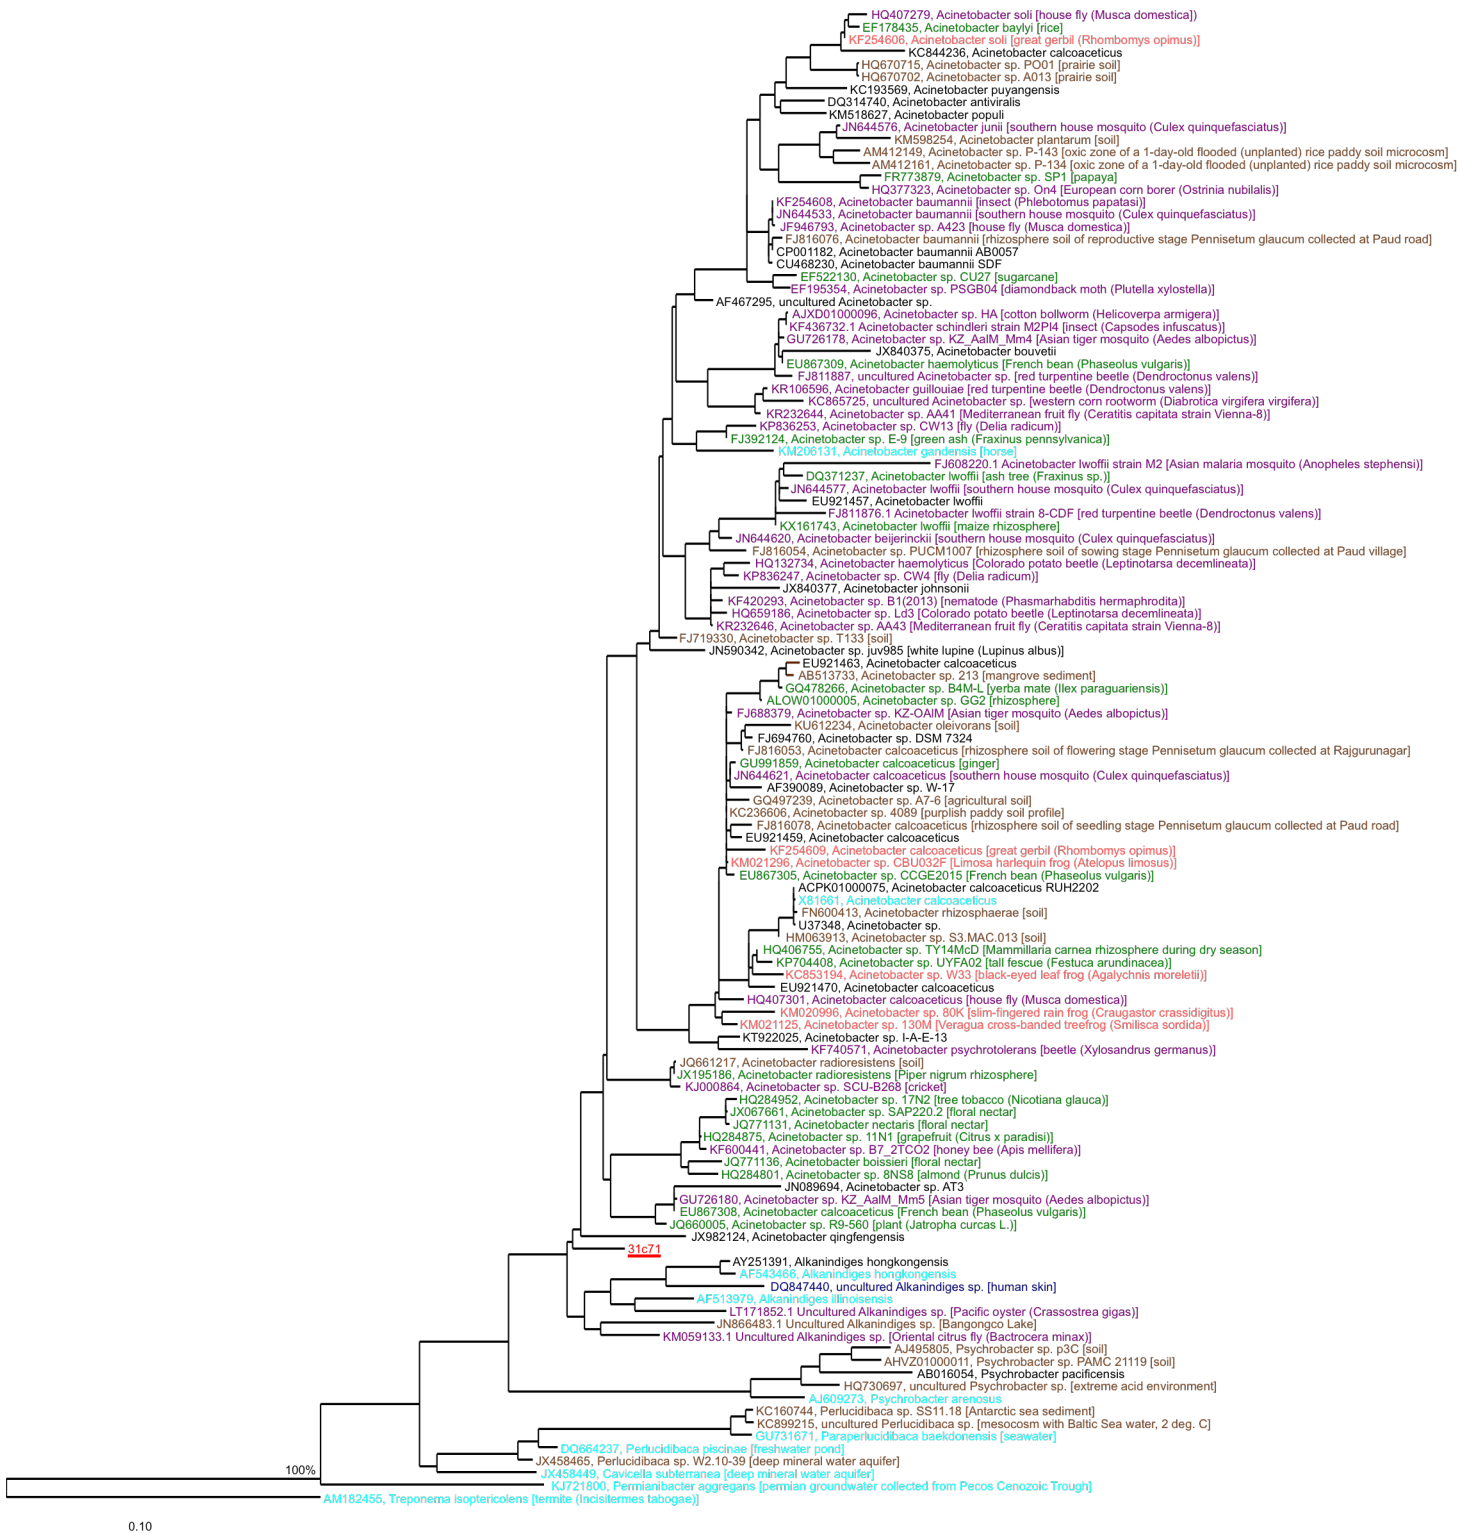

**Fig S11. Phylogenetic tree containing 31c71 and relative Moraxellaceae.**  
See Fig S6 for other information.

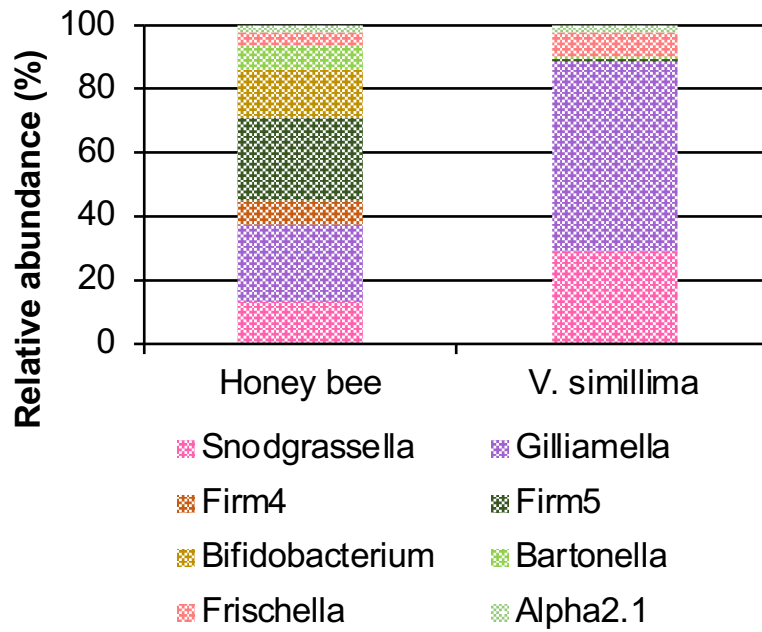

**Fig S12. Comparison of honey bee gut microbiome and their relatives in the hornet gut.** Relative abundance of major eight genera in the honey bee gut and their relatives in the *V. simillima* gut. Plots are scaled to 100%.

**Table S1. Top hit sequences of hornet core OTUs in BLAST search**

| OTU ID    | e-value                                             | Identity (%)                                                         | Accession number | Organism                                            | Isolation source                                                         | Host                                  |                                  |                       |                        |
|-----------|-----------------------------------------------------|----------------------------------------------------------------------|------------------|-----------------------------------------------------|--------------------------------------------------------------------------|---------------------------------------|----------------------------------|-----------------------|------------------------|
| 80f1d     | 3.00E-131                                           | 100                                                                  | NR_126291        | Gibbsiella greigii                                  | n. d.                                                                    | n. d.                                 |                                  |                       |                        |
|           |                                                     |                                                                      | NR_118387        | Gibbsiella papilionis                               | intestinal tract                                                         | Mycocalesis gotama                    |                                  |                       |                        |
|           |                                                     |                                                                      | GU826700         | Serratia sp. TN49                                   | n. d.                                                                    | Batocera horsfieldi (Hope)            |                                  |                       |                        |
|           |                                                     |                                                                      | NR_108121        | Gibbsiella dentisursi                               | bear oral cavity                                                         | n. d.                                 |                                  |                       |                        |
|           |                                                     |                                                                      | GU562342         | Gibbsiella quercinecans                             | n. d.                                                                    | n. d.                                 |                                  |                       |                        |
|           |                                                     |                                                                      | NR_117526        | Gibbsiella quercinecans                             | n. d.                                                                    | n. d.                                 |                                  |                       |                        |
|           |                                                     |                                                                      | GU417538         | uncultured Serratia sp.                             | biological degreasing systems                                            | n. d.                                 |                                  |                       |                        |
| EF534572  | Serratia sp. N-78b                                  | Spanish oak forest                                                   | n. d.            |                                                     |                                                                          |                                       |                                  |                       |                        |
| 85d49     | 7.00E-132                                           | 100                                                                  | NR_126291        | Gibbsiella greigii                                  | No description                                                           | n. d.                                 |                                  |                       |                        |
|           |                                                     |                                                                      | NR_118387        | Gibbsiella papilionis                               | intestinal tract                                                         | Mycocalesis gotama                    |                                  |                       |                        |
|           |                                                     |                                                                      | GU826700         | Serratia sp. TN49                                   | n. d.                                                                    | Batocera horsfieldi (Hope)            |                                  |                       |                        |
|           |                                                     |                                                                      | NR_108121        | Gibbsiella dentisursi                               | bear oral cavity                                                         | n. d.                                 |                                  |                       |                        |
|           |                                                     |                                                                      | GU562342         | Gibbsiella quercinecans                             | n. d.                                                                    | n. d.                                 |                                  |                       |                        |
|           |                                                     |                                                                      | NR_117526        | Gibbsiella quercinecans                             | n. d.                                                                    | n. d.                                 |                                  |                       |                        |
|           |                                                     |                                                                      | GU417538         | uncultured Serratia sp.                             | biological degreasing systems                                            | n. d.                                 |                                  |                       |                        |
| EF534572  | Serratia sp. N-78b                                  | Spanish oak forest                                                   | n. d.            |                                                     |                                                                          |                                       |                                  |                       |                        |
| 1d321     | 3.00E-131                                           | 100                                                                  | AY350737         | Zymomonas mobilis subsp. pomaceae                   | n. d.                                                                    | n. d.                                 |                                  |                       |                        |
| a1527     | 1.00E-128                                           | 99                                                                   | JX228434         | bacterium 37-L049660-122-017-E05                    | Anderson impactor sample from plate bac15                                | n. d.                                 |                                  |                       |                        |
|           | 6.00E-127                                           | 99                                                                   | CP028349         | Pantoea vagans                                      | blood of an infant                                                       | Homo sapiens                          |                                  |                       |                        |
| f26d5     | 3.00E-131                                           | 100                                                                  | MH379795         | uncultured Enterobacteriaceae bacterium             | plants of soil contaminated by high concentrations of toxic metals, lead | n. d.                                 |                                  |                       |                        |
|           |                                                     |                                                                      | MG831371         | uncultured Enterobacteriaceae bacterium             | n. d.                                                                    | n. d.                                 |                                  |                       |                        |
|           |                                                     |                                                                      | KX450472         | Lonsdalea sp.                                       | pollen                                                                   | Colchicum autumnale                   |                                  |                       |                        |
|           |                                                     |                                                                      | JN600327         | Pectobacterium aroidearum                           | n. d.                                                                    | n. d.                                 |                                  |                       |                        |
|           |                                                     |                                                                      | CP003776         | Pectobacterium carotovorum subsp. carotovorum PCC21 | n. d.                                                                    | n. d.                                 |                                  |                       |                        |
|           |                                                     |                                                                      | JQ046877         | uncultured bacterium                                | phyllosphere                                                             | apple cultivar Gala                   |                                  |                       |                        |
|           |                                                     |                                                                      | JF311446         | Lonsdalea britannica                                | n. d.                                                                    | n. d.                                 |                                  |                       |                        |
|           |                                                     |                                                                      | NR_118127        | Lonsdalea britannica                                | n. d.                                                                    | n. d.                                 |                                  |                       |                        |
|           |                                                     |                                                                      | HM196339         | Lonsdalea quercina                                  | n. d.                                                                    | n. d.                                 |                                  |                       |                        |
|           |                                                     |                                                                      | HM150665         | Pectobacterium carotovorum subsp. carotovorum       | n. d.                                                                    | n. d.                                 |                                  |                       |                        |
|           |                                                     |                                                                      | HM179991         | Pectobacterium carotovorum subsp. carotovorum       | soil                                                                     | n. d.                                 |                                  |                       |                        |
|           |                                                     |                                                                      | GU915088         | Erwinia sp. AaMG18                                  | midgut                                                                   | Aedes albopictus                      |                                  |                       |                        |
|           |                                                     |                                                                      | EF534571         | Lonsdalea quercina                                  | Spanish oak forest                                                       | n. d.                                 |                                  |                       |                        |
|           |                                                     |                                                                      | DQ785511         | Pectobacterium carotovorum (Erwinia carotovora)     | n. d.                                                                    | n. d.                                 |                                  |                       |                        |
|           |                                                     |                                                                      | DQ298132         | Lonsdalea quercina                                  | plant thorns                                                             | n. d.                                 |                                  |                       |                        |
|           |                                                     |                                                                      | DQ068843         | uncultured bacterium                                | GI tract sample, freshly caught antlion, OTU8                            | Myrmeleon mobilis                     |                                  |                       |                        |
|           |                                                     |                                                                      | 8d2cb            | 7.00E-132                                           | 100                                                                      | KX450472                              | Lonsdalea sp.                    | pollen                | Colchicum autumnale    |
| JN600327  | Pectobacterium aroidearum                           | n. d.                                                                |                  |                                                     |                                                                          | n. d.                                 |                                  |                       |                        |
| CP003776  | Pectobacterium carotovorum subsp. carotovorum PCC21 | n. d.                                                                |                  |                                                     |                                                                          | n. d.                                 |                                  |                       |                        |
| JQ046877  | uncultured bacterium                                | phyllosphere                                                         |                  |                                                     |                                                                          | apple cultivar Gala                   |                                  |                       |                        |
| JF311446  | Lonsdalea britannica                                | n. d.                                                                |                  |                                                     |                                                                          | n. d.                                 |                                  |                       |                        |
| NR_118127 | Lonsdalea britannica                                | n. d.                                                                |                  |                                                     |                                                                          | n. d.                                 |                                  |                       |                        |
| HM196339  | Lonsdalea quercina                                  | n. d.                                                                |                  |                                                     |                                                                          | n. d.                                 |                                  |                       |                        |
| HM150665  | Pectobacterium carotovorum subsp. carotovorum       | n. d.                                                                |                  |                                                     |                                                                          | n. d.                                 |                                  |                       |                        |
| HM179991  | Pectobacterium carotovorum subsp. carotovorum       | soil                                                                 |                  |                                                     |                                                                          | n. d.                                 |                                  |                       |                        |
| GU915088  | Erwinia sp. AaMG18                                  | midgut                                                               |                  |                                                     |                                                                          | Aedes albopictus                      |                                  |                       |                        |
| EF534571  | Lonsdalea quercina                                  | Spanish oak forest                                                   |                  |                                                     |                                                                          | n. d.                                 |                                  |                       |                        |
| DQ785511  | Pectobacterium carotovorum (Erwinia carotovora)     | n. d.                                                                |                  |                                                     |                                                                          | n. d.                                 |                                  |                       |                        |
| DQ298132  | Lonsdalea quercina                                  | plant thorns                                                         |                  |                                                     |                                                                          | n. d.                                 |                                  |                       |                        |
| DQ068843  | uncultured bacterium                                | GI tract sample, freshly caught antlion, OTU8                        |                  |                                                     |                                                                          | Myrmeleon mobilis                     |                                  |                       |                        |
| 65a05     | 3.00E-131                                           | 100                                                                  |                  |                                                     |                                                                          | KF600463                              | Zymobacter palmae                | bee bread food stores | Apis mellifera         |
|           |                                                     |                                                                      |                  |                                                     |                                                                          | NR_041786                             | Zymobacter palmae                | n. d.                 | n. d.                  |
|           |                                                     |                                                                      |                  |                                                     |                                                                          | HM110603                              | uncultured gamma proteobacterium | single abdomen        | Chalybion californicum |
|           |                                                     |                                                                      | AF211871         | Zymobacter palmae                                   | n. d.                                                                    | n. d.                                 |                                  |                       |                        |
|           |                                                     |                                                                      | 5c0d             | 3.00E-124                                           | 98                                                                       | KF600463                              | Zymobacter palmae                | bee bread food stores | Apis mellifera         |
| NR_041786 | Zymobacter palmae                                   | n. d.                                                                |                  |                                                     |                                                                          | n. d.                                 |                                  |                       |                        |
| HM110603  | uncultured gamma proteobacterium                    | single abdomen                                                       |                  |                                                     |                                                                          | Chalybion californicum                |                                  |                       |                        |
| NR_043806 | Halotalea alkalienta                                | alkaline alpeorujo, sludge-like byproduct of the olive mill industry |                  |                                                     |                                                                          | n. d.                                 |                                  |                       |                        |
| AF211871  | Zymobacter palmae                                   | n. d.                                                                |                  |                                                     |                                                                          | n. d.                                 |                                  |                       |                        |
| 31c71     | 1.00E-129                                           | 99                                                                   | KC137147         | uncultured bacterium                                | adult worker ant                                                         | Polyrhachis monteithi voucher CSM0709 |                                  |                       |                        |
|           | 1.00E-128                                           | 99                                                                   | LC333521         | Acinetobacter sp.                                   | floral nectar                                                            | n. d.                                 |                                  |                       |                        |
| bed3d     | 8.00E-125                                           | 98                                                                   | KF600463         | Zymobacter palmae                                   | bee bread food stores                                                    | Apis mellifera                        |                                  |                       |                        |
|           |                                                     |                                                                      | NR_041786        | Zymobacter palmae                                   | n. d.                                                                    | n. d.                                 |                                  |                       |                        |
|           |                                                     |                                                                      | HM110603         | uncultured gamma proteobacterium                    | single abdomen                                                           | Chalybion californicum                |                                  |                       |                        |
|           |                                                     |                                                                      | NR_043806        | Halotalea alkalienta                                | alkaline alpeorujo, sludge-like byproduct of the olive mill industry     | n. d.                                 |                                  |                       |                        |
|           |                                                     |                                                                      | AF211871         | Zymobacter palmae                                   | n. d.                                                                    | n. d.                                 |                                  |                       |                        |
| 5c53b     | 3.00E-131                                           | 100                                                                  | NR_149810        | Gilliamella bombicola                               | bumble bee gut                                                           | n. d.                                 |                                  |                       |                        |
|           |                                                     |                                                                      | KM454417         | Gilliamella apicola                                 | n. d.                                                                    | n. d.                                 |                                  |                       |                        |
|           |                                                     |                                                                      | CP007445         | Gilliamella apicola                                 | n. d.                                                                    | n. d.                                 |                                  |                       |                        |
|           |                                                     |                                                                      | KF600321         | Gilliamella apicola                                 | alimentary tract hindgut                                                 | Apis mellifera                        |                                  |                       |                        |
|           |                                                     |                                                                      | JQ389991         | uncultured gamma proteobacterium                    | bee gut                                                                  | Bombus bohemicus                      |                                  |                       |                        |
| f9b86     | 7.00E-132                                           | 100                                                                  | NR_149810        | Gilliamella bombicola                               | bumble bee gut                                                           | n. d.                                 |                                  |                       |                        |
|           |                                                     |                                                                      | KM454417         | Gilliamella apicola                                 | n. d.                                                                    | n. d.                                 |                                  |                       |                        |
|           |                                                     |                                                                      | CP007445         | Gilliamella apicola                                 | n. d.                                                                    | n. d.                                 |                                  |                       |                        |
|           |                                                     |                                                                      | KF600321         | Gilliamella apicola                                 | alimentary tract hindgut                                                 | Apis mellifera                        |                                  |                       |                        |
|           |                                                     |                                                                      | JQ389991         | uncultured gamma proteobacterium                    | bee gut                                                                  | Bombus bohemicus                      |                                  |                       |                        |

Sequences with the highest similarity to core OTUs are shown. Information on isolation source and host are referred in GenBank. The OTU IDs were shortened to the last five characters. Core OTUs unique to *V. mandarinia*, *V. simillima*, and shared between both are highlighted in blue, yellow, and green, respectively.
